# Supplementary material
Source: Springer Nature journal article supplement (https://www.springermedizin.de/resource/supplementary/12957_2011_1012_MOESM2_ESM.pdf/9562204)

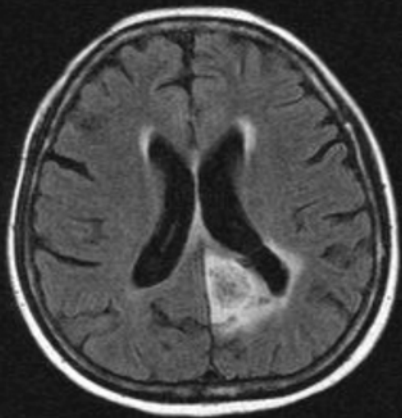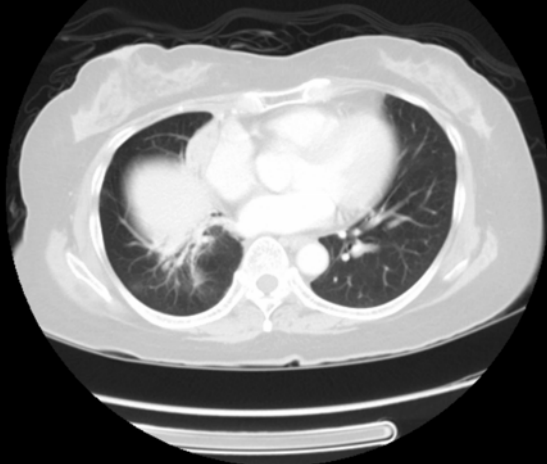

Supplement: MOESM2 [file 9562204]
